# Supplementary material for: Psychoacoustic and Archeoacoustic nature of ancient Aztec skull whistles
Source: PubMed Central journal article supplement — Commun Psychol. 2024 Nov 11;2:108. doi: 10.1038/s44271-024-00157-7 (PMC11555264; doi:10.1038/s44271-024-00157-7), 2024-11-11
Supplement: 44271_2024_157_MOESM2_ESM.pdf [file 44271_2024_157_MOESM2_ESM.pdf]

## SUPPLEMENTAL INFORMATION

**Title:** Psychoacoustic and archeoacoustic nature of ancient Aztec skull whistles

**Authors:** S Frühholz, P Rodriguez, M Bonard, F Steiner, M Bobin

---

## SUPPLEMENTAL FIGURES

**Figure S1 | Representation similarity analysis on SW sounds. (a)** Representational similarity analysis (RSA) on the acoustic patterns. **(b)** RSA on the perceptual rating patterns.

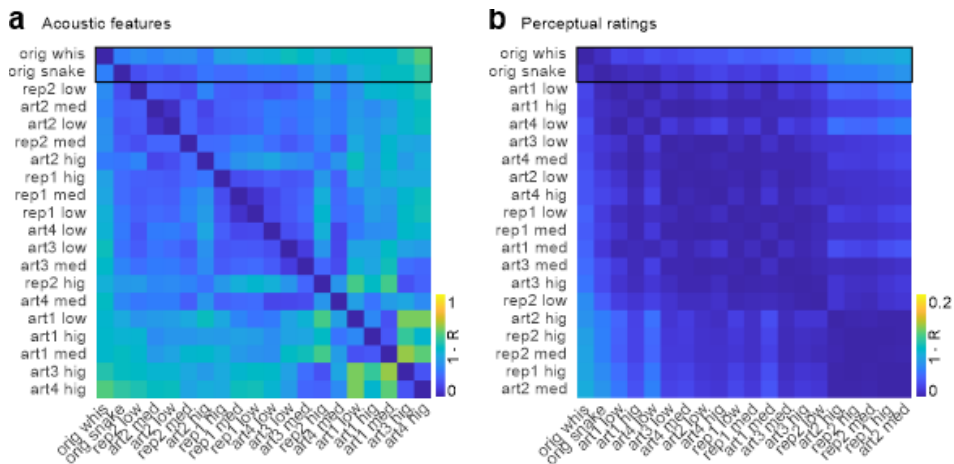

**Figure S2 | Brain responses to SW sounds.** (a) Functional brain activity in human listeners (n=32) when comparing activity for SW with activity for all other 5 general sound categories separately. (b) Same as in (a) but reversed contrasts in terms of higher brain activity for other sounds compared with SW sounds. All brain activity includes a voxel threshold  $p < 0.05$  (FWE corrected), cluster threshold  $k = 10$ .

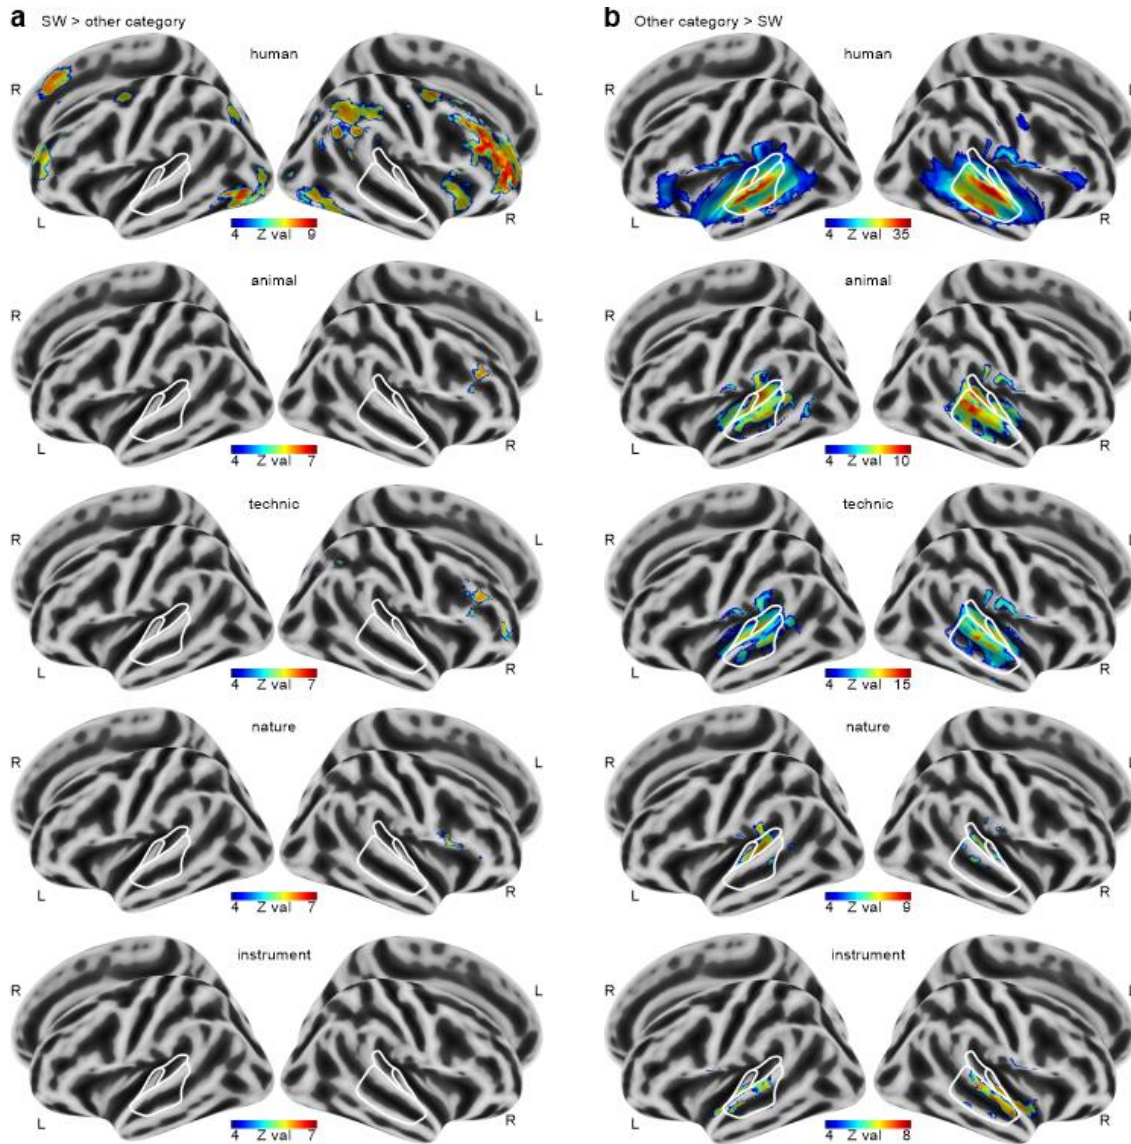

## SUPPLEMENTAL TABLES

**Table S1 | Description of sound files.** The study used a general collection of n=2567 sounds from 86 different sound categories. The table lists the abbreviations, file name, and the number of sounds per sound category.

| Abbreviation      | Full name                             | Number of sounds |
|-------------------|---------------------------------------|------------------|
| SW orig           | SKULL WHISTLE original                | 35               |
| SW high           | SKULL WHISTLE replica high            | 90               |
| SW med            | SKULL WHISTLE replica medium          | 90               |
| SW low            | SKULL WHISTLE replica low             | 90               |
| AZT flu           | AZTEC ancient flute                   | 15               |
| AZT inc           | AZTEC ancient incense                 | 4                |
| AZT tru           | AZTEC ancient trumpet                 | 11               |
| MEX eag           | MEXICAN flute eagle                   | 12               |
| MEX jag           | MEXICAN flute jaguar                  | 11               |
| MEX llo           | MEXICAN flute llorona                 | 11               |
| MEX owl           | MEXICAN flute owl                     | 12               |
| MEX sca           | MEXICAN flute scary / monkey          | 17               |
| MEX tur           | MEXICAN flute turtle                  | 11               |
| MEX eag mod       | MEXICAN flute eagle (modulated)       | 10               |
| MEX jag mod       | MEXICAN flute jaguar (modulated)      | 13               |
| MEX llo mod       | MEXICAN flute llorona (modulated)     | 10               |
| MEX owl mod       | MEXICAN flute owl (modulated)         | 11               |
| MEX sca mod       | MEXICAN flute scary (modulated)       | 8                |
| MEX tur mod       | MEXICAN flute turtle (modulated)      | 13               |
| ANI bird (pas)    | ANIMAL bird passeriformes             | 21               |
| ANI bird (psi)    | ANIMAL bird psittaciformes            | 22               |
| ANI bird (str)    | ANIMAL bird strigiformes              | 24               |
| ANI insect (buzz) | ANIMAL insect buzzing                 | 25               |
| ANI insect (str)  | ANIMAL insect stridulations (criquet) | 23               |
| ANI mamm (bov)    | ANIMAL mammal bovidae                 | 29               |
| ANI mamm (can)    | ANIMAL mammal canidae                 | 40               |
| ANI mamm (fel)    | ANIMAL mammal felidae                 | 37               |
| ANI mamm (mon)    | ANIMAL mammal monkey                  | 21               |
| ANI mamm (sui)    | ANIMAL mammal suidae                  | 21               |
| ANI rept (cro)    | ANIMAL reptile crocodylia             | 20               |
| ANI rept (squ)    | ANIMAL reptile squamata               | 29               |
| ANI amph (anu)    | ANIMAL amphibian anura                | 22               |
| ANI bird (acc)    | ANIMAL bird accipitriformes           | 22               |
| ANI bird (gal)    | ANIMAL bird galliformes               | 35               |
| HUM speech        | HUMAN speech                          | 22               |
| HUM whisper       | HUMAN whisper                         | 30               |
| HUM mouth         | HUMAN mouth                           | 15               |
| HUM anger         | HUMAN voice anger                     | 5                |
| HUM fear          | HUMAN voice fear                      | 10               |
| HUM pain          | HUMAN voice pain                      | 5                |
| HUM sadness       | HUMAN voice sadness                   | 5                |

|                 |                                 |    |
|-----------------|---------------------------------|----|
| HUM neutral     | HUMAN voice neutral             | 20 |
| HUM joy         | HUMAN voice joy                 | 15 |
| HUM laugh       | HUMAN voice laugh               | 28 |
| HUM pleasure    | HUMAN voice pleasure            | 5  |
| HUM ulu         | HUMAN voice ululation           | 25 |
| HUM baby        | HUMAN baby cry                  | 62 |
| HUM body (move) | HUMAN body movement             | 53 |
| HUM body (bre)  | HUMAN body breath               | 27 |
| HUM body (che)  | HUMAN body chewing              | 27 |
| HUM body (har)  | HUMAN body solid parts          | 21 |
| HUM body (ill)  | HUMAN body illness              | 76 |
| HUM body (nai)  | HUMAN body nails                | 20 |
| HUM body (sno)  | HUMAN body snoring              | 38 |
| HUM body (swa)  | HUMAN body swallowing           | 20 |
| NAT crack       | NATURE cracking sounds          | 22 |
| NAT fire        | NATURE fire                     | 34 |
| NAT thu         | NATURE thunder                  | 42 |
| NAT water (dro) | NATURE water dropping           | 30 |
| NAT water (rai) | NATURE water rain               | 32 |
| NAT water (flo) | NATURE water flowing            | 41 |
| NAT wind        | NATURE wind                     | 35 |
| EXT horn        | EXTERIOR alarm horn             | 26 |
| EXT siren       | EXTERIOR alarm siren            | 31 |
| EXT aerial      | EXTERIOR aerial                 | 64 |
| EXT tool (cha)  | EXTERIOR tool chainsaw          | 30 |
| EXT tool (saw)  | EXTERIOR tool handsaw           | 29 |
| EXT engine      | EXTERIOR engine                 | 36 |
| EXT firearm     | EXTERIOR firearm                | 21 |
| EXT fireworks   | EXTERIOR fireworks              | 29 |
| EXT bell        | EXTERIOR bell                   | 20 |
| INT alarm (clo) | INTERIOR alarm clock            | 27 |
| INT alarm (whi) | INTERIOR alarm whistle          | 21 |
| INT door        | INTERIOR door                   | 41 |
| INT clean       | INTERIOR cleaning machines      | 63 |
| INT glass       | INTERIOR glass                  | 31 |
| INT neutral     | INTERIOR neutral                | 76 |
| INT water (pou) | INTERIOR water pouring          | 36 |
| INT water (toi) | INTERIOR water toilet           | 36 |
| INS brass       | INSTRUMENT brass                | 30 |
| INS guitar      | INSTRUMENT guitar               | 30 |
| INS perc        | INSTRUMENT percussion           | 30 |
| INS string      | INSTRUMENT string instruments   | 53 |
| INS wood        | INSTRUMENT woodwind instruments | 30 |
| MUS elec        | MUSIC electronic                | 80 |
| SYN sound       | SYNTHETIC sounds                | 30 |

**Table S2 | Posthoc pairwise comparisons.** The table reports results from posthoc pairwise comparisons for the valence ratings (perceptual assessment and ratings of sounds). Abbreviations: *ani* animal, *env* environment, *ext* exterior, *int* interior, *hum* human, *mus* music, *ins* instrument, *mex* mexican, *syn* synthetic.

| Category 1 | Category 2 | F value  | p value   | eta2     | CI95% lower | CI95% upper |
|------------|------------|----------|-----------|----------|-------------|-------------|
| SW low     | hum        | 1119.323 | 1.09E-238 | 0.136951 | 0.121867    | 0.15307     |
| SW low     | ani        | 1044.8   | 1.27E-223 | 0.156204 | 0.13837     | 0.175149    |
| SW low     | env        | 212.6834 | 1.67E-47  | 0.076053 | 0.058479    | 0.09588     |
| SW low     | ext        | 364.7535 | 4.86E-80  | 0.077402 | 0.061661    | 0.093363    |
| SW low     | int        | 24.72738 | 1.09E-06  | 0.007798 | 0.003398    | 0.013898    |
| SW low     | mus        | 74.26949 | 1.52E-17  | 0.017184 | 0.010749    | 0.025192    |
| SW low     | ins        | 34.14636 | 9.31E-09  | 0.011675 | 0.004834    | 0.020934    |
| SW low     | mex        | 4.772415 | 0.037193  | 0.001127 | 3.73E-06    | 0.006828    |
| SW low     | syn        | 7.488601 | 0.008284  | 0.001368 | 4.66E-06    | 0.007203    |
| SW med     | hum        | 1060.158 | 1.18E-226 | 0.129239 | 0.113313    | 0.146034    |
| SW med     | ani        | 989.264  | 3.10E-212 | 0.147495 | 0.129405    | 0.166844    |
| SW med     | env        | 198.0645 | 2.25E-44  | 0.06775  | 0.050841    | 0.086543    |
| SW med     | ext        | 333.4328 | 2.28E-73  | 0.069945 | 0.054897    | 0.086385    |
| SW med     | int        | 17.05152 | 5.47E-05  | 0.005593 | 0.002056    | 0.011133    |
| SW med     | mus        | 60.22986 | 1.75E-14  | 0.013997 | 0.008015    | 0.021314    |
| SW med     | ins        | 25.60176 | 7.24E-07  | 0.008328 | 0.002859    | 0.016559    |
| SW med     | mex        | 2.966708 | 0.098717  | 0.002207 | 1.70E-05    | 0.008836    |
| SW med     | syn        | 4.308536 | 0.047087  | 0.000371 | 9.38E-07    | 0.004495    |
| SW high    | hum        | 1003.155 | 4.81E-215 | 0.122615 | 0.107351    | 0.138376    |
| SW high    | ani        | 935.7472 | 4.21E-201 | 0.140305 | 0.122503    | 0.158716    |
| SW high    | env        | 184.1359 | 2.03E-41  | 0.061062 | 0.045087    | 0.07887     |
| SW high    | ext        | 303.8363 | 4.72E-67  | 0.06365  | 0.049182    | 0.079392    |
| SW high    | int        | 10.8686  | 0.00141   | 0.003707 | 0.000933    | 0.00835     |
| SW high    | mus        | 47.80517 | 9.13E-12  | 0.011128 | 0.006053    | 0.01783     |
| SW high    | ins        | 18.37087 | 2.86E-05  | 0.00559  | 0.001226    | 0.0128      |
| SW high    | mex        | 1.603268 | 0.22413   | 0.004031 | 0.000226    | 0.012264    |
| SW high    | syn        | 2.025953 | 0.173975  | 6.54E-07 | 7.05E-07    | 0.002876    |
| SW orig    | hum        | 245.0976 | 1.97E-54  | 0.08444  | 0.073379    | 0.096217    |
| SW orig    | ani        | 232.531  | 9.28E-52  | 0.100885 | 0.087749    | 0.115266    |
| SW orig    | env        | 191.6912 | 5.01E-43  | 0.06722  | 0.051334    | 0.084874    |
| SW orig    | ext        | 76.76913 | 4.59E-18  | 0.059515 | 0.047311    | 0.072553    |
| SW orig    | int        | 1.221047 | 0.284999  | 0.010612 | 0.005867    | 0.01651     |
| SW orig    | mus        | 8.910373 | 0.00393   | 0.016646 | 0.010791    | 0.023152    |
| SW orig    | ins        | 3.223824 | 0.087103  | 0.019215 | 0.01003     | 0.030479    |
| SW orig    | mex        | 0.228533 | 0.650692  | 0.00151  | 5.15E-06    | 0.014249    |
| SW orig    | syn        | 0.090607 | 0.763409  | 0.011316 | 0.002549    | 0.025886    |
| SW low     | SW med     | 0.470964 | 1.27E-223 | 0.000265 | 6.30E-07    | 0.003892    |
| SW low     | SW high    | 1.859309 | 1.67E-47  | 0.001177 | 3.95E-06    | 0.006417    |
| SW low     | SW orig    | 2.126339 | 4.86E-80  | 0.004094 | 0.000176    | 0.012933    |
| SW med     | SW high    | 0.458815 | 2.25E-44  | 0.000309 | 9.10E-07    | 0.004022    |
| SW med     | SW orig    | 1.068671 | 2.28E-73  | 0.005902 | 0.000712    | 0.01599     |
| SW high    | SW orig    | 0.378007 | 4.72E-67  | 0.008826 | 0.00184     | 0.020225    |

**Table S3 | Posthoc pairwise comparisons.** The table reports results from posthoc pairwise comparisons for the urgency ratings (perceptual assessment and ratings of sounds).

| Category 1 | Category 2 | F value  | p value   | eta2     | CI95% lower | CI95% upper |
|------------|------------|----------|-----------|----------|-------------|-------------|
| SW low     | hum        | 1119.323 | 1.09E-238 | 0.136951 | 0.121867    | 0.15307     |
| SW low     | ani        | 1044.8   | 1.27E-223 | 0.156204 | 0.13837     | 0.175149    |
| SW low     | env        | 212.6834 | 1.67E-47  | 0.076053 | 0.058479    | 0.09588     |
| SW low     | ext        | 364.7535 | 4.86E-80  | 0.077402 | 0.061661    | 0.093363    |
| SW low     | int        | 24.72738 | 1.09E-06  | 0.007798 | 0.003398    | 0.013898    |
| SW low     | mus        | 74.26949 | 1.52E-17  | 0.017184 | 0.010749    | 0.025192    |
| SW low     | ins        | 34.14636 | 9.31E-09  | 0.011675 | 0.004834    | 0.020934    |
| SW low     | mex        | 4.772415 | 0.037193  | 0.001127 | 3.73E-06    | 0.006828    |
| SW low     | syn        | 7.488601 | 0.008284  | 0.001368 | 4.66E-06    | 0.007203    |
| SW med     | hum        | 1060.158 | 1.18E-226 | 0.129239 | 0.113313    | 0.146034    |
| SW med     | ani        | 989.264  | 3.10E-212 | 0.147495 | 0.129405    | 0.166844    |
| SW med     | env        | 198.0645 | 2.25E-44  | 0.06775  | 0.050841    | 0.086543    |
| SW med     | ext        | 333.4328 | 2.28E-73  | 0.069945 | 0.054897    | 0.086385    |
| SW med     | int        | 17.05152 | 5.47E-05  | 0.005593 | 0.002056    | 0.011133    |
| SW med     | mus        | 60.22986 | 1.75E-14  | 0.013997 | 0.008015    | 0.021314    |
| SW med     | ins        | 25.60176 | 7.24E-07  | 0.008328 | 0.002859    | 0.016559    |
| SW med     | mex        | 2.966708 | 0.098717  | 0.002207 | 1.70E-05    | 0.008836    |
| SW med     | syn        | 4.308536 | 0.047087  | 0.000371 | 9.38E-07    | 0.004495    |
| SW high    | hum        | 1003.155 | 4.81E-215 | 0.122615 | 0.107351    | 0.138376    |
| SW high    | ani        | 935.7472 | 4.21E-201 | 0.140305 | 0.122503    | 0.158716    |
| SW high    | env        | 184.1359 | 2.03E-41  | 0.061062 | 0.045087    | 0.07887     |
| SW high    | ext        | 303.8363 | 4.72E-67  | 0.06365  | 0.049182    | 0.079392    |
| SW high    | int        | 10.8686  | 0.00141   | 0.003707 | 0.000933    | 0.00835     |
| SW high    | mus        | 47.80517 | 9.13E-12  | 0.011128 | 0.006053    | 0.01783     |
| SW high    | ins        | 18.37087 | 2.86E-05  | 0.00559  | 0.001226    | 0.0128      |
| SW high    | mex        | 1.603268 | 0.22413   | 0.004031 | 0.000226    | 0.012264    |
| SW high    | syn        | 2.025953 | 0.173975  | 6.54E-07 | 7.05E-07    | 0.002876    |
| SW orig    | hum        | 245.0976 | 1.97E-54  | 0.08444  | 0.073379    | 0.096217    |
| SW orig    | ani        | 232.531  | 9.28E-52  | 0.100885 | 0.087749    | 0.115266    |
| SW orig    | env        | 191.6912 | 5.01E-43  | 0.06722  | 0.051334    | 0.084874    |
| SW orig    | ext        | 76.76913 | 4.59E-18  | 0.059515 | 0.047311    | 0.072553    |
| SW orig    | int        | 1.221047 | 0.284999  | 0.010612 | 0.005867    | 0.01651     |
| SW orig    | mus        | 8.910373 | 0.00393   | 0.016646 | 0.010791    | 0.023152    |
| SW orig    | ins        | 3.223824 | 0.087103  | 0.019215 | 0.01003     | 0.030479    |
| SW orig    | mex        | 0.228533 | 0.650692  | 0.00151  | 5.15E-06    | 0.014249    |
| SW orig    | syn        | 0.090607 | 0.763409  | 0.011316 | 0.002549    | 0.025886    |
| SW low     | SW med     | 0.470964 | 1.27E-223 | 0.000265 | 6.30E-07    | 0.003892    |
| SW low     | SW high    | 1.859309 | 1.67E-47  | 0.001177 | 3.95E-06    | 0.006417    |
| SW low     | SW orig    | 2.126339 | 4.86E-80  | 0.004094 | 0.000176    | 0.012933    |
| SW med     | SW high    | 0.458815 | 2.25E-44  | 0.000309 | 9.10E-07    | 0.004022    |
| SW med     | SW orig    | 1.068671 | 2.28E-73  | 0.005902 | 0.000712    | 0.01599     |
| SW high    | SW orig    | 0.378007 | 4.72E-67  | 0.008826 | 0.00184     | 0.020225    |

**Table S4 | Posthoc pairwise comparisons.** The table reports results from posthoc pairwise comparisons for the arousal ratings (perceptual assessment and ratings of sounds).

| Category 1 | Category 2 | F value  | p value   | eta2     | CI95% lower | CI95% upper |
|------------|------------|----------|-----------|----------|-------------|-------------|
| SW low     | hum        | 19.85941 | 1.21E-05  | 0.001884 | 0.000342    | 0.004675    |
| SW low     | ani        | 2.384787 | 0.137851  | 3.19E-05 | 3.76E-07    | 0.001387    |
| SW low     | env        | 0.01132  | 0.915271  | 0.045704 | 0.030856    | 0.064081    |
| SW low     | ext        | 297.2033 | 1.27E-65  | 0.066931 | 0.05011     | 0.086       |
| SW low     | int        | 158.7395 | 7.57E-36  | 0.0334   | 0.022364    | 0.046636    |
| SW low     | mus        | 297.5557 | 1.20E-65  | 0.063217 | 0.047851    | 0.081094    |
| SW low     | ins        | 67.5712  | 4.03E-16  | 0.01614  | 0.007571    | 0.028136    |
| SW low     | mex        | 7.349885 | 0.007794  | 0.000697 | 1.36E-06    | 0.006185    |
| SW low     | syn        | 18.66802 | 2.16E-05  | 0.002926 | 8.83E-05    | 0.010091    |
| SW med     | hum        | 10.94356 | 0.001192  | 0.001003 | 4.79E-05    | 0.003281    |
| SW med     | ani        | 0.183791 | 0.687228  | 6.06E-05 | 3.98E-07    | 0.001399    |
| SW med     | env        | 0.564548 | 0.493571  | 0.052064 | 0.036078    | 0.071659    |
| SW med     | ext        | 335.3945 | 1.73E-73  | 0.073872 | 0.055951    | 0.093704    |
| SW med     | int        | 187.1069 | 6.28E-42  | 0.038371 | 0.026281    | 0.052279    |
| SW med     | mus        | 336.6251 | 1.25E-73  | 0.069756 | 0.053356    | 0.088717    |
| SW med     | ins        | 85.07072 | 6.55E-20  | 0.020209 | 0.010478    | 0.032364    |
| SW med     | mex        | 10.90544 | 0.001192  | 0.000132 | 8.11E-07    | 0.004113    |
| SW med     | syn        | 26.69295 | 3.60E-07  | 0.00492  | 0.000613    | 0.013422    |
| SW high    | hum        | 0.297786 | 0.619706  | 4.58E-05 | 2.21E-07    | 0.001046    |
| SW high    | ani        | 10.98774 | 0.001192  | 0.002679 | 0.000455    | 0.006759    |
| SW high    | env        | 8.501249 | 0.004263  | 0.076776 | 0.057126    | 0.098395    |
| SW high    | ext        | 480.2873 | 3.10E-104 | 0.100166 | 0.078883    | 0.123266    |
| SW high    | int        | 299.2929 | 5.78E-66  | 0.057539 | 0.042726    | 0.074956    |
| SW high    | mus        | 485.2382 | 5.42E-105 | 0.094354 | 0.075676    | 0.115979    |
| SW high    | ins        | 158.4904 | 7.96E-36  | 0.037002 | 0.022918    | 0.053397    |
| SW high    | mex        | 27.94581 | 1.97E-07  | 0.001236 | 3.45E-06    | 0.007342    |
| SW high    | syn        | 64.07404 | 2.25E-15  | 0.014995 | 0.00571     | 0.028361    |
| SW orig    | hum        | 42.03787 | 1.49E-10  | 0.000119 | 3.38E-07    | 0.001379    |
| SW orig    | ani        | 60.66761 | 1.20E-14  | 0.002006 | 0.000202    | 0.005747    |
| SW orig    | env        | 113.0169 | 5.46E-26  | 0.062902 | 0.041125    | 0.087678    |
| SW orig    | ext        | 317.9859 | 7.66E-70  | 0.070426 | 0.050764    | 0.092804    |
| SW orig    | int        | 229.934  | 3.72E-51  | 0.037283 | 0.024496    | 0.053082    |
| SW orig    | mus        | 308.0388 | 8.82E-68  | 0.06119  | 0.044626    | 0.081043    |
| SW orig    | ins        | 172.0687 | 1.05E-38  | 0.02991  | 0.016182    | 0.047107    |
| SW orig    | mex        | 84.90015 | 6.74E-20  | 0.003425 | 1.63E-05    | 0.017539    |
| SW orig    | syn        | 118.2857 | 4.14E-27  | 0.017915 | 0.005671    | 0.036924    |
| SW low     | SW med     | 0.771608 | 0.137851  | 0.000261 | 8.56E-07    | 0.004025    |
| SW low     | SW high    | 14.63806 | 0.915271  | 0.004649 | 0.000426    | 0.012918    |
| SW low     | SW orig    | 64.84289 | 1.27E-65  | 0.005652 | 0.000482    | 0.016807    |
| SW med     | SW high    | 8.689057 | 0.493571  | 0.002689 | 6.42E-05    | 0.009405    |
| SW med     | SW orig    | 56.44443 | 1.73E-73  | 0.003531 | 4.89E-05    | 0.013342    |
| SW high    | SW orig    | 32.51393 | 3.10E-104 | 0.00012  | 6.65E-07    | 0.004275    |

**Table S5 | Posthoc pairwise comparisons.** The table reports results from posthoc pairwise comparisons for the naturalness ratings (perceptual assessment and ratings of sounds).

| Category 1 | Category 2 | F value  | p value   | eta2     | CI95% lower | CI95% upper |
|------------|------------|----------|-----------|----------|-------------|-------------|
| SW low     | hum        | 19.85941 | 1.21E-05  | 0.001884 | 0.000342    | 0.004675    |
| SW low     | ani        | 2.384787 | 0.137851  | 3.19E-05 | 3.76E-07    | 0.001387    |
| SW low     | env        | 0.01132  | 0.915271  | 0.045704 | 0.030856    | 0.064081    |
| SW low     | ext        | 297.2033 | 1.27E-65  | 0.066931 | 0.05011     | 0.086       |
| SW low     | int        | 158.7395 | 7.57E-36  | 0.0334   | 0.022364    | 0.046636    |
| SW low     | mus        | 297.5557 | 1.20E-65  | 0.063217 | 0.047851    | 0.081094    |
| SW low     | ins        | 67.5712  | 4.03E-16  | 0.01614  | 0.007571    | 0.028136    |
| SW low     | mex        | 7.349885 | 0.007794  | 0.000697 | 1.36E-06    | 0.006185    |
| SW low     | syn        | 18.66802 | 2.16E-05  | 0.002926 | 8.83E-05    | 0.010091    |
| SW med     | hum        | 10.94356 | 0.001192  | 0.001003 | 4.79E-05    | 0.003281    |
| SW med     | ani        | 0.183791 | 0.687228  | 6.06E-05 | 3.98E-07    | 0.001399    |
| SW med     | env        | 0.564548 | 0.493571  | 0.052064 | 0.036078    | 0.071659    |
| SW med     | ext        | 335.3945 | 1.73E-73  | 0.073872 | 0.055951    | 0.093704    |
| SW med     | int        | 187.1069 | 6.28E-42  | 0.038371 | 0.026281    | 0.052279    |
| SW med     | mus        | 336.6251 | 1.25E-73  | 0.069756 | 0.053356    | 0.088717    |
| SW med     | ins        | 85.07072 | 6.55E-20  | 0.020209 | 0.010478    | 0.032364    |
| SW med     | mex        | 10.90544 | 0.001192  | 0.000132 | 8.11E-07    | 0.004113    |
| SW med     | syn        | 26.69295 | 3.60E-07  | 0.00492  | 0.000613    | 0.013422    |
| SW high    | hum        | 0.297786 | 0.619706  | 4.58E-05 | 2.21E-07    | 0.001046    |
| SW high    | ani        | 10.98774 | 0.001192  | 0.002679 | 0.000455    | 0.006759    |
| SW high    | env        | 8.501249 | 0.004263  | 0.076776 | 0.057126    | 0.098395    |
| SW high    | ext        | 480.2873 | 3.10E-104 | 0.100166 | 0.078883    | 0.123266    |
| SW high    | int        | 299.2929 | 5.78E-66  | 0.057539 | 0.042726    | 0.074956    |
| SW high    | mus        | 485.2382 | 5.42E-105 | 0.094354 | 0.075676    | 0.115979    |
| SW high    | ins        | 158.4904 | 7.96E-36  | 0.037002 | 0.022918    | 0.053397    |
| SW high    | mex        | 27.94581 | 1.97E-07  | 0.001236 | 3.45E-06    | 0.007342    |
| SW high    | syn        | 64.07404 | 2.25E-15  | 0.014995 | 0.00571     | 0.028361    |
| SW orig    | hum        | 42.03787 | 1.49E-10  | 0.000119 | 3.38E-07    | 0.001379    |
| SW orig    | ani        | 60.66761 | 1.20E-14  | 0.002006 | 0.000202    | 0.005747    |
| SW orig    | env        | 113.0169 | 5.46E-26  | 0.062902 | 0.041125    | 0.087678    |
| SW orig    | ext        | 317.9859 | 7.66E-70  | 0.070426 | 0.050764    | 0.092804    |
| SW orig    | int        | 229.934  | 3.72E-51  | 0.037283 | 0.024496    | 0.053082    |
| SW orig    | mus        | 308.0388 | 8.82E-68  | 0.06119  | 0.044626    | 0.081043    |
| SW orig    | ins        | 172.0687 | 1.05E-38  | 0.02991  | 0.016182    | 0.047107    |
| SW orig    | mex        | 84.90015 | 6.74E-20  | 0.003425 | 1.63E-05    | 0.017539    |
| SW orig    | syn        | 118.2857 | 4.14E-27  | 0.017915 | 0.005671    | 0.036924    |
| SW low     | SW med     | 0.771608 | 0.137851  | 0.000261 | 8.56E-07    | 0.004025    |
| SW low     | SW high    | 14.63806 | 0.915271  | 0.004649 | 0.000426    | 0.012918    |
| SW low     | SW orig    | 64.84289 | 1.27E-65  | 0.005652 | 0.000482    | 0.016807    |
| SW med     | SW high    | 8.689057 | 0.493571  | 0.002689 | 6.42E-05    | 0.009405    |
| SW med     | SW orig    | 56.44443 | 1.73E-73  | 0.003531 | 4.89E-05    | 0.013342    |
| SW high    | SW orig    | 32.51393 | 3.10E-104 | 0.00012  | 6.65E-07    | 0.004275    |



**Table S6 | Full statistics for binomial test.** The table reports full statistics for the binomial test for the frequency occurrence of nouns (free choice labeling experiment). FDR corrected p-values, relative risk (RR) as measure of effect size, confidence interval bounds.

|                | <b>word</b> | <b>p FDR</b> | <b>prob success</b> | <b>RR relative risk</b> | <b>CI95% lower</b> | <b>CI95% upper</b> |
|----------------|-------------|--------------|---------------------|-------------------------|--------------------|--------------------|
| <b>SW orig</b> | scream      | 0            | 0.3085              | 16.3505                 | 0.2410             | 0.3826             |
|                | train       | 7.74E-09     | 0.1085              | 5.7505                  | 0.0666             | 0.1642             |
|                | whistle     | 3.28E-08     | 0.1085              | 5.7505                  | 0.0666             | 0.1642             |
|                | flute       | 1.47E-07     | 0.1028              | 5.4484                  | 0.0621             | 0.1576             |
|                | kettle      | 6.64E-07     | 0.1028              | 5.4484                  | 0.0621             | 0.1576             |
|                | instrument  | 1.44E-05     | 0.0857              | 4.5421                  | 0.0487             | 0.1374             |
|                | human       | 3.21E-02     | 0.0514              | 2.7242                  | 0.0237             | 0.0953             |
|                | wind        | 0.074088     | 0.0400              | 2.1200                  | 0.0162             | 0.0806             |
|                | machine     | 0.628828     | 0.0228              | 1.2084                  | 0.0062             | 0.0574             |
|                | unkown      | 0.777269     | 0.0171              | 0.9063                  | 0.0035             | 0.0492             |
|                | car         | 0.325332     | 0.0114              | 0.6042                  | 0.0013             | 0.0406             |
|                | adult       | 0.325332     | 0.0114              | 0.6042                  | 0.0013             | 0.0406             |
|                |             |              |                     |                         |                    |                    |
| <b>SW high</b> | scream      | 0            | 0.7413              | 25.9455                 | 0.6518             | 0.8182             |
|                | human       | 0.037422     | 0.0862              | 3.0170                  | 0.0421             | 0.1528             |
|                | machine     | 0.469231     | 0.0431              | 1.5085                  | 0.0141             | 0.0977             |
|                | kettle      | 0.999999     | 0.0258              | 0.9030                  | 0.0053             | 0.0737             |
|                | wind        | 0.999999     | 0.0258              | 0.9030                  | 0.0053             | 0.0737             |
|                | drilling    | 0.358295     | 0.0172              | 0.6020                  | 0.0020             | 0.0608             |
|                | adult       | 0.358295     | 0.0172              | 0.6020                  | 0.0020             | 0.0608             |
|                | animal      | 0.358295     | 0.0086              | 0.3010                  | 0.0002             | 0.0470             |
|                | train       | 0.167933     | 0.0086              | 0.3010                  | 0.0002             | 0.0470             |
|                | whistle     | 0.167933     | 0.0086              | 0.3010                  | 0.0002             | 0.0470             |
|                | pet         | 0.167933     | 0.0086              | 0.3010                  | 0.0002             | 0.0470             |
|                | unkown      | 0.167933     | 0.0000              | 0.0000                  | 0.0000             | 0.0313             |
|                |             |              |                     |                         |                    |                    |
| <b>SW med</b>  | scream      | 0            | 0.5666              | 26.6302                 | 0.4580             | 0.6708             |
|                | machine     | 3.91E-07     | 0.1444              | 6.7868                  | 0.0792             | 0.2343             |
|                | kettle      | 0.002767     | 0.0888              | 4.1736                  | 0.0391             | 0.1676             |
|                | car         | 0.130358     | 0.0666              | 3.1302                  | 0.0248             | 0.1394             |
|                | tires       | 0.861106     | 0.0222              | 1.0434                  | 0.0027             | 0.0779             |
|                | human       | 0.861106     | 0.0222              | 1.0434                  | 0.0027             | 0.0779             |
|                | wind        | 0.861106     | 0.0222              | 1.0434                  | 0.0027             | 0.0779             |
|                | drilling    | 0.405255     | 0.1110              | 5.2170                  | 0.0002             | 0.0603             |
|                | unkown      | 0.405255     | 0.1110              | 5.2170                  | 0.0002             | 0.0603             |
|                | adult       | 0.405255     | 0.1110              | 5.2170                  | 0.0002             | 0.0603             |
|                | television  | 0.405255     | 0.1110              | 5.2170                  | 0.0002             | 0.0603             |
|                | brakes      | 0.405255     | 0.1110              | 5.2170                  | 0.0002             | 0.0603             |
|                |             |              |                     |                         |                    |                    |
| <b>SW high</b> | scream      | 0            | 0.5617              | 25.8382                 | 0.4525             | 0.6668             |
|                | car         | 0.000863     | 0.1011              | 4.6506                  | 0.0472             | 0.1833             |
|                | human       | 0.052964     | 0.0674              | 3.1004                  | 0.0251             | 0.1409             |

|  |          |          |        |        |        |        |
|--|----------|----------|--------|--------|--------|--------|
|  | machine  | 0.135146 | 0.0561 | 2.5806 | 0.0184 | 0.1262 |
|  | kettle   | 0.595836 | 0.0337 | 1.5502 | 0.0070 | 0.0953 |
|  | animal   | 0.595836 | 0.0337 | 1.5502 | 0.0070 | 0.0953 |
|  | pet      | 0.785816 | 0.0224 | 1.0304 | 0.0027 | 0.0788 |
|  | unkown   | 0.785816 | 0.0224 | 1.0304 | 0.0027 | 0.0788 |
|  | tires    | 0.463973 | 0.0112 | 0.5152 | 0.0002 | 0.0610 |
|  | drilling | 0.463973 | 0.0112 | 0.5152 | 0.0002 | 0.0610 |
|  | child    | 0.463973 | 0.0112 | 0.5152 | 0.0002 | 0.0610 |
|  | wind     | 0.463973 | 0.0112 | 0.5152 | 0.0002 | 0.0610 |

**Table S7 | Full statistics for binomial test.** The table reports full statistics for the binomial test for the frequency occurrence of adjectives (free choice labeling experiment). FDR corrected p-values, relative risk (RR) as measure of effect size, and confidence interval bounds.

|                | <b>word</b>    | <b>p FDR</b> | <b>prob success</b> | <b>RR relative risk</b> | <b>CI95% lower</b> | <b>CI95% upper</b> |
|----------------|----------------|--------------|---------------------|-------------------------|--------------------|--------------------|
| <b>SW orig</b> | aversive       | 0            | 0.3098              | 21.0664                 | 0.2350             | 0.3928             |
|                | scary          | 0            | 0.1760              | 11.9680                 | 0.1172             | 0.2488             |
|                | indifferent    | 1.33E-15     | 0.1619              | 11.0092                 | 0.1055             | 0.2330             |
|                | unpleasant     | 6.72E-07     | 0.0985              | 6.6980                  | 0.0549             | 0.1598             |
|                | frightend      | 1.27E-02     | 0.0563              | 3.8284                  | 0.0246             | 0.1079             |
|                | calm           | 0.119147     | 0.0352              | 2.3936                  | 0.0115             | 0.0802             |
|                | pleasant       | 0.119147     | 0.0352              | 2.3936                  | 0.0115             | 0.0802             |
|                | alarming       | 0.704044     | 0.0281              | 1.9108                  | 0.0077             | 0.0705             |
|                | excited        | 1            | 0.0140              | 0.9520                  | 0.0017             | 0.0499             |
|                | irritating     | 1            | 0.0140              | 0.9520                  | 0.0017             | 0.0499             |
|                | happy          | 0.794103     | 0.0070              | 0.4760                  | 0.0001             | 0.0386             |
|                | stressed       | 0.794103     | 0.0070              | 0.4760                  | 0.0001             | 0.0386             |
|                |                |              |                     |                         |                    |                    |
|                |                |              |                     |                         |                    |                    |
|                | <b>SW high</b> | scary        | 0                   | 0.3928                  | 17.2832            | 0.2280             |
| aversive       |                | 3.56E-12     | 0.2142              | 9.4248                  | 0.1322             | 0.3173             |
| frightened     |                | 2.39E-07     | 0.1547              | 6.8068                  | 0.0850             | 0.2500             |
| unpleasant     |                | 0.009254     | 0.0952              | 4.1888                  | 0.0420             | 0.1790             |
| indifferent    |                | 0.955696     | 0.0238              | 1.0472                  | 0.0028             | 0.0833             |
| alarming       |                | 0.404502     | 0.0119              | 0.5236                  | 0.0003             | 0.0645             |
| irritating     |                | 0.404502     | 0.0119              | 0.5236                  | 0.0003             | 0.0645             |
| terrifying     |                | 0.404502     | 0.0119              | 0.5236                  | 0.0003             | 0.0645             |
| saddening      |                | 0.404502     | 0.0119              | 0.5236                  | 0.0003             | 0.0645             |
| nervous        |                | 0.404502     | 0.0119              | 0.5236                  | 0.0003             | 0.0645             |
| worrying       |                | 0.404502     | 0.0119              | 0.5236                  | 0.0003             | 0.0645             |
| stressed       |                | 0.404502     | 0.0119              | 0.5236                  | 0.0003             | 0.0645             |
|                |                |              |                     |                         |                    |                    |
|                |                |              |                     |                         |                    |                    |
| <b>SW med</b>  |                | aversive     | 0                   | 0.3695                  | 17.3665            | 0.2712             |
|                | scary          | 6.94E-09     | 0.1739              | 8.1733                  | 0.1028             | 0.2670             |
|                | unpleasant     | 2.58E-06     | 0.0141              | 0.6641                  | 0.0774             | 0.2295             |
|                | frightened     | 8.39E-05     | 0.1195              | 5.6165                  | 0.0612             | 0.2038             |
|                | indifferent    | 0.008591     | 0.0869              | 4.0843                  | 0.0382             | 0.1641             |
|                | alarming       | 0.490843     | 0.4340              | 20.3980                 | 0.0119             | 0.1075             |
|                | irritating     | 0.325862     | 0.0108              | 0.5076                  | 0.0002             | 0.0590             |
|                | terrifying     | 0.325862     | 0.0108              | 0.5076                  | 0.0002             | 0.0590             |
|                | attentive      | 0.325862     | 0.0108              | 0.5076                  | 0.0002             | 0.0590             |
|                | excited        | 0.325862     | 0.0108              | 0.5076                  | 0.0002             | 0.0590             |
|                | loud           | 0.325862     | 0.0108              | 0.5076                  | 0.0002             | 0.0590             |
|                | saddening      | 0.325862     | 0.0108              | 0.5076                  | 0.0002             | 0.0590             |
|                |                |              |                     |                         |                    |                    |
|                |                |              |                     |                         |                    |                    |
|                | <b>SW low</b>  | aversive     | 0                   | 0.3125                  | 14.6875            | 0.2217             |
| scary          |                | 0            | 0.2500              | 11.7500                 | 0.1672             | 0.3487             |
| frightend      |                | 7.25E-08     | 0.1562              | 7.3414                  | 0.0901             | 0.2445             |

|  |             |          |        |        |        |        |
|--|-------------|----------|--------|--------|--------|--------|
|  | indifferent | 0.003174 | 0.0833 | 3.9151 | 0.0366 | 0.1576 |
|  | unpleasant  | 0.003174 | 0.0833 | 3.9151 | 0.0366 | 0.1576 |
|  | alarming    | 0.792649 | 0.0208 | 0.9776 | 0.0025 | 0.0732 |
|  | excited     | 0.792649 | 0.0208 | 0.9776 | 0.0025 | 0.0732 |
|  | pleasant    | 0.413387 | 0.0104 | 0.4888 | 0.0002 | 0.0566 |
|  | worrying    | 0.413387 | 0.0104 | 0.4888 | 0.0002 | 0.0566 |
|  | saddening   | 0.413387 | 0.0104 | 0.4888 | 0.0002 | 0.0566 |
|  | concerned   | 0.413387 | 0.0104 | 0.4888 | 0.0002 | 0.0566 |
|  | attentive   | 0.167933 | 0.0000 | 0.0000 | 0.0000 | 0.0376 |

**Table S8 | Full statistics for binomial test.** The table reports full statistics for the binomial test for the frequency occurrence of nouns (reabeled data) (free choice labeling experiment). FDR corrected p-values, relative risk (RR) as measure of effect size, and confidence interval bounds.

|                | <b>word</b> | <b>p FDR</b> | <b>prob success</b> | <b>RR relative risk</b> | <b>CI95% lower</b> | <b>CI95% upper</b> |
|----------------|-------------|--------------|---------------------|-------------------------|--------------------|--------------------|
| <b>SW orig</b> | human       | 4.38E-18     | 0.3563              | 3.2067                  | 0.2971             | 0.3981             |
|                | exterior    | 0.000105     | 0.1815              | 1.6335                  | 0.1430             | 0.2254             |
|                | interior    | 0.001691     | 0.1675              | 1.5075                  | 0.1303             | 0.2104             |
|                | instrument  | 0.010023     | 0.1592              | 1.4328                  | 0.1228             | 0.2013             |
|                | nature      | 0.801035     | 0.1145              | 1.0305                  | 0.0834             | 0.1521             |
|                | animal      | 1.21E-10     | 0.0195              | 0.1755                  | 0.0078             | 0.0398             |
|                | unknown     | 2.80E-14     | 0.0083              | 0.0747                  | 0.0017             | 0.0242             |
|                | synthetic   | 2.80E-14     | 0.0000              | 0.0000                  | 0.0000             | 0.0102             |
|                | music       | 2.80E-14     | 0.0000              | 0.0000                  | 0.0000             | 0.0102             |
|                |             |              |                     |                         |                    |                    |
| <b>SW high</b> | human       | 0            | 0.7741              | 6.9669                  | 0.7127             | 0.8280             |
|                | interior    | 0.745836     | 0.1013              | 0.9117                  | 0.0646             | 0.1494             |
|                | exterior    | 0.147573     | 0.0783              | 0.7047                  | 0.0462             | 0.1224             |
|                | nature      | 4.34E-05     | 0.0322              | 0.2898                  | 0.0130             | 0.0653             |
|                | animal      | 1.02E-08     | 0.0092              | 0.0828                  | 0.0011             | 0.0328             |
|                | unknown     | 2.40E-11     | 0.0000              | 0.0000                  | 0.0000             | 0.0168             |
|                | instrument  | 2.40E-11     | 0.0000              | 0.0000                  | 0.0000             | 0.0168             |
|                | synthetic   | 2.40E-11     | 0.0000              | 0.0000                  | 0.0000             | 0.0168             |
|                | music       | 2.40E-11     | 0.0000              | 0.0000                  | 0.0000             | 0.0168             |
|                |             |              |                     |                         |                    |                    |
| <b>SW med</b>  | human       | 0            | 0.4654              | 4.1886                  | 0.3976             | 0.5341             |
|                | exterior    | 2.30E-12     | 0.2949              | 2.6541                  | 0.2351             | 0.3604             |
|                | interior    | 6.97E-06     | 0.2165              | 1.9485                  | 0.1636             | 0.1111             |
|                | nature      | 6.31E-08     | 0.0184              | 0.1656                  | 0.0050             | 0.0465             |
|                | animal      | 4.88E-10     | 0.0046              | 0.0414                  | 0.0001             | 0.0254             |
|                | unknown     | 4.88E-10     | 0.0046              | 0.0414                  | 0.0001             | 0.0254             |
|                | synthetic   | 2.00E-11     | 0.0000              | 0.0000                  | 0.0000             | 0.0168             |
|                | instrument  | 2.00E-11     | 0.0000              | 0.0000                  | 0.0000             | 0.0168             |
|                | music       | 2.00E-11     | 0.0000              | 0.0000                  | 0.0000             | 0.0168             |
|                |             |              |                     |                         |                    |                    |
| <b>SW low</b>  | human       | 0            | 0.5742              | 5.1678                  | 0.5029             | 0.6433             |
|                | exterior    | 5.43E-07     | 0.1633              | 1.4697                  | 0.1152             | 0.2217             |
|                | interior    | 0.50236      | 0.0990              | 0.8910                  | 0.0615             | 0.1487             |
|                | animal      | 0.037044     | 0.0643              | 0.5787                  | 0.0347             | 0.1075             |
|                | unknown     | 4.67E-08     | 0.0099              | 0.0891                  | 0.0012             | 0.0353             |
|                | nature      | 4.67E-08     | 0.0099              | 0.0891                  | 0.0012             | 0.0353             |
|                | synthetic   | 1.54E-10     | 0.0000              | 0.0000                  | 0.0000             | 0.0180             |
|                | instrument  | 1.54E-10     | 0.0000              | 0.0000                  | 0.0000             | 0.0180             |
|                | music       | 1.54E-10     | 0.0000              | 0.0000                  | 0.0000             | 0.0180             |
|                |             |              |                     |                         |                    |                    |

**Table S9 | Full statistics for binomial test.** The table reports full statistics for the binomial test for the frequency occurrence of adjectives (reabeled data) (free choice labeling experiment). FDR corrected p-values, relative risk (RR) as measure of effect size, and confidence interval bounds.

|                | <b>word</b>  | <b>p FDR</b> | <b>prob success</b> | <b>RR relative risk</b> | <b>CI95% lower</b> | <b>CI95% upper</b> |
|----------------|--------------|--------------|---------------------|-------------------------|--------------------|--------------------|
| <b>SW orig</b> | fear         | 3.74E-16     | 0.6267              | 6.2670                  | 0.5744             | 0.6769             |
|                | joy          | 3.52E-15     | 0.2506              | 2.5060                  | 0.2066             | 0.2988             |
|                | neutral      | 0.053097     | 0.0696              | 0.6960                  | 0.0455             | 0.1010             |
|                | anger        | 1.80E-08     | 0.0222              | 0.2220                  | 0.0096             | 0.0434             |
|                | anticipation | 8.76E-12     | 0.0139              | 0.1390                  | 0.0045             | 0.0322             |
|                | sadness      | 1.13E-12     | 0.0111              | 0.1110                  | 0.0030             | 0.0282             |
|                | disgust      | 3.05E-14     | 0.0027              | 0.0270                  | 0.0007             | 0.0154             |
|                | trust        | 3.05E-14     | 0.0027              | 0.0270                  | 0.0007             | 0.0154             |
|                | unknown      | 1.15E-14     | 0.0000              | 0.0000                  | 0.0000             | 0.0102             |
|                | surprise     | 1.15E-14     | 0.0000              | 0.0000                  | 0.0000             | 0.0102             |
|                |              |              |                     |                         |                    |                    |
| <b>SW high</b> | fear         | 0            | 0.8680              | 8.6800                  | 0.8180             | 0.9085             |
|                | joy          | 0.828119     | 0.0936              | 0.9360                  | 0.0596             | 0.1383             |
|                | neutral      | 7.03E-07     | 0.0170              | 0.1700                  | 0.0046             | 0.0430             |
|                | anger        | 1.46E-08     | 0.0127              | 0.1270                  | 0.0026             | 0.0368             |
|                | anticipation | 6.14E-11     | 0.0042              | 0.0420                  | 0.0001             | 0.0234             |
|                | sadness      | 6.14E-11     | 0.0042              | 0.0420                  | 0.0001             | 0.0234             |
|                | disgust      | 6.14E-11     | 0.0042              | 0.0420                  | 0.0001             | 0.0234             |
|                | unknown      | 6.14E-11     | 0.0000              | 0.0000                  | 0.0000             | 0.0155             |
|                | surprise     | 6.14E-11     | 0.0000              | 0.0000                  | 0.0000             | 0.0155             |
|                | trust        | 6.14E-11     | 0.0000              | 0.0000                  | 0.0000             | 0.0155             |
|                |              |              |                     |                         |                    |                    |
| <b>SW med</b>  | fear         | 0            | 0.7892              | 7.8920                  | 0.7402             | 0.8483             |
|                | joy          | 0.056738     | 0.1403              | 1.4030                  | 0.0980             | 0.1923             |
|                | neutral      | 0.000156     | 0.3500              | 3.5000                  | 0.0152             | 0.0679             |
|                | anger        | 3.20E-08     | 0.0131              | 0.1310                  | 0.0027             | 0.0379             |
|                | anticipation | 2.21E-09     | 0.0043              | 0.0430                  | 0.0001             | 0.0241             |
|                | sadness      | 2.21E-09     | 0.0043              | 0.0430                  | 0.0001             | 0.0241             |
|                | surprise     | 9.66E-11     | 0.0000              | 0.0000                  | 0.0000             | 0.0160             |
|                | disgust      | 9.66E-11     | 0.0000              | 0.0000                  | 0.0000             | 0.0160             |
|                | unknown      | 9.66E-11     | 0.0000              | 0.0000                  | 0.0000             | 0.0160             |
|                | trust        | 9.66E-11     | 0.0000              | 0.0000                  | 0.0000             | 0.0160             |
|                |              |              |                     |                         |                    |                    |
| <b>SW low</b>  | fear         | 0            | 0.8151              | 8.1510                  | 0.7580             | 0.8623             |
|                | joy          | 0.278554     | 0.1218              | 1.2180                  | 0.0831             | 0.1702             |
|                | neutral      | 0.001752     | 0.0420              | 0.4200                  | 0.0203             | 0.0759             |
|                | anticipation | 9.85E-09     | 0.0126              | 0.1260                  | 0.0026             | 0.0363             |
|                | sadness      | 1.05E-09     | 0.0042              | 0.0420                  | 0.0001             | 0.0231             |
|                | anger        | 1.05E-09     | 0.0042              | 0.0420                  | 0.0001             | 0.0231             |
|                | unknown      | 4.55E-11     | 0.0000              | 0.0000                  | 0.0000             | 0.0153             |
|                | disgust      | 4.55E-11     | 0.0000              | 0.0000                  | 0.0000             | 0.0153             |
|                | surprise     | 4.55E-11     | 0.0000              | 0.0000                  | 0.0000             | 0.0153             |
|                |              |              |                     |                         |                    |                    |

|  |       |          |        |        |        |        |
|--|-------|----------|--------|--------|--------|--------|
|  | trust | 4.55E-11 | 0.0000 | 0.0000 | 0.0000 | 0.0153 |
|--|-------|----------|--------|--------|--------|--------|

**Table S10 | Full statistics for posthoc pairwise comparisons.** The table reports full statistics for the posthoc pairwise comparison for the dichotic listening experiment (SW orig). Abbreviations: *ani* animal, *env* environment, *ext* exterior, *hum* human, *mus* music, *noi* noise, *sil* silence.

| Category 1 | Category 2 | p value | eta2   | CI95% lower | CI95% upper |
|------------|------------|---------|--------|-------------|-------------|
| SW orig    | ani        | 1.0000  | 0.0000 | -37.9248    | 32.1106     |
| SW orig    | env        | 0.9958  | 0.0002 | -44.2954    | 27.8276     |
| SW orig    | ext        | 0.0052  | 0.0054 | -82.3583    | -9.4808     |
| SW orig    | hum        | 1.0000  | 0.0000 | -34.9100    | 32.9508     |
| SW orig    | mus        | 0.4730  | 0.0011 | -51.7596    | 11.3656     |
| SW orig    | noi        | 0.9845  | 0.0002 | -39.9036    | 22.2625     |
| SW orig    | sil        | 0.0088  | 0.0047 | -81.4812    | -7.5112     |
| ani        | sil        | 0.0004  | 0.0012 | -68.9802    | -14.1980    |
| env        | sil        | 0.0100  | 0.0071 | -91.7386    | -7.9074     |
| ext        | sil        | 0.0000  | 0.0205 | -124.4961   | -50.5213    |
| hum        | sil        | 0.0129  | 0.0052 | -79.2627    | -5.8748     |
| mus        | sil        | 0.0001  | 0.0110 | -97.9582    | -25.6140    |
| noi        | sil        | 0.0019  | 0.0070 | -87.4085    | -13.4109    |



**Table S11 | Full statistics for posthoc pairwise comparisons.** The table reports full statistics for the posthoc pairwise comparison for the dichotic listening experiment (SW repl). Abbreviations: *ani* animal, *env* environment, *ext* exterior, *hum* human, *mus* music, *noi* noise, *sil* silence.

| Category 1 | Category 2 | p value | eta2   | CI95% lower | CI95% upper |
|------------|------------|---------|--------|-------------|-------------|
| SW repl    | ani        | 0.9200  | 0.0006 | -57.0748    | 25.2781     |
| SW repl    | env        | 0.9998  | 0.0001 | -51.6010    | 39.0743     |
| SW repl    | ext        | 0.0457  | 0.0049 | -89.4474    | -0.5010     |
| SW repl    | hum        | 0.9384  | 0.0003 | -43.1054    | 19.9991     |
| SW repl    | mus        | 0.9493  | 0.0006 | -61.1334    | 29.2667     |
| SW repl    | noi        | 1.0000  | 0.0000 | -36.5461    | 45.0705     |
| SW repl    | sil        | 0.0000  | 0.0166 | -143.5963   | -46.5271    |
| ani        | sil        | 0.0035  | 0.0249 | -139.9673   | -18.3594    |
| env        | sil        | 0.0000  | 0.0201 | -134.8203   | -36.0330    |
| ext        | sil        | 0.0000  | 0.0420 | -179.5136   | -68.7614    |
| hum        | sil        | 0.0004  | 0.0224 | -150.5336   | -30.8994    |
| mus        | sil        | 0.0000  | 0.0253 | -138.9469   | -51.2464    |
| noi        | sil        | 0.0033  | 0.0149 | -132.2090   | -17.5933    |

**Table S12 | Peak location of brain activity.** (a) Significant brain activity when comparing SW against all other sounds, (b) other sounds versus SW, (c) SW versus animated sounds, (d) animated versus SW, (e) SW versus artificial sounds, (f) and artificial sounds versus SW sounds. All brain activity includes a voxel threshold  $p < 0.05$  (FWE corrected), cluster threshold  $k=10$ .

| Region                             | Cluster size | Z value | MNI coordinates |     |     |
|------------------------------------|--------------|---------|-----------------|-----|-----|
|                                    |              |         | x               | y   | z   |
| <b>(a) SW &gt; other sounds</b>    |              |         |                 |     |     |
| L occipital gyrus                  | 13           | 4.66    | -28             | -84 | 6   |
| R middle frontal gyrus             | 165          | 6.32    | 46              | 34  | 24  |
| R inferior frontal gyrus           | 297          | 5.88    | 40              | 50  | 4   |
|                                    |              | 4.59    | 46              | 40  | -8  |
| R medial frontal cortex            | 243          | 5.46    | 6               | 34  | 42  |
|                                    |              | 5.38    | 8               | 40  | 32  |
| R inferior frontal gyrus           | 28           | 5.26    | 48              | 16  | 8   |
| R insula                           | 76           | 5.14    | 34              | 20  | 2   |
|                                    |              | 4.80    | 32              | 24  | -6  |
| R intraparietal sulcus             | 54           | 5.00    | 30              | -56 | 38  |
|                                    |              |         |                 |     |     |
| <b>(b) Other sounds &gt; SW</b>    |              |         |                 |     |     |
| L superior temporal gyrus          | 3101         | Inf     | -54             | -20 | 4   |
| L planum polare                    |              | 4.63    | -38             | 0   | -20 |
| R planum temporale                 | 3537         | Inf     | 54              | -18 | 2   |
| R superior temporal gyrus          |              | Inf     | 64              | -26 | 6   |
|                                    |              |         |                 |     |     |
| <b>(c) SW &gt; animated sounds</b> |              |         |                 |     |     |
| L occipital gyrus                  | 115          | 5.30    | -28             | -84 | 6   |
| L inferior temporal gyrus          | 136          | 5.26    | -42             | -76 | -4  |
| L inferior frontal sulcus          | 61           | 5.00    | -28             | -8  | 42  |
| R middle frontal gyrus             | 1334         | 7.36    | 46              | 34  | 24  |
|                                    |              | 6.17    | 40              | 58  | 6   |
| R inferior frontal sulcus          |              | 6.07    | 40              | 56  | -2  |
| R middle frontal gyrus             | 515          | 6.21    | 20              | 0   | 52  |
| R medial frontal cortex            |              | 6.02    | 8               | 38  | 32  |
|                                    |              | 5.65    | 6               | 30  | 40  |
| R intraparietal sulcus             | 879          | 5.78    | 42              | -52 | 46  |
|                                    |              | 5.60    | 38              | -48 | 40  |
|                                    |              | 5.10    | 48              | -38 | 42  |
| R insula                           | 88           | 5.36    | 32              | 20  | 2   |
| R inferior temporal sulcus         | 21           | 4.89    | 40              | -54 | -14 |
|                                    |              |         |                 |     |     |
| <b>(d) Animated sounds &gt; SW</b> |              |         |                 |     |     |
| L superior temporal gyrus          | 5941         | Inf     | -62             | -18 | 0   |
| L superior temporal sulcus         |              | Inf     | -42             | -36 | 8   |
| L planum polare                    |              | Inf     | -38             | 0   | -20 |
| L inferior frontal gyrus           | 244          | 7.46    | -42             | 28  | -2  |
|                                    |              | 4.79    | -36             | 32  | -14 |
| R superior temporal gyrus          | 5726         | Inf     | 62              | -10 | -4  |
|                                    |              | Inf     | 62              | -28 | 4   |

|                                      |      |      |     |     |     |
|--------------------------------------|------|------|-----|-----|-----|
| R inferior frontal gyrus             | 27   | 5.03 | 56  | 32  | 2   |
|                                      |      |      |     |     |     |
| <b>(e) SW &gt; artificial sounds</b> |      |      |     |     |     |
| R middle frontal gyrus               | 67   | 5.50 | 48  | 32  | 24  |
| R inferior frontal sulcus            | 141  | 5.17 | 42  | 54  | 6   |
| R medial frontal cortex              | 28   | 4.84 | 8   | 34  | 44  |
|                                      |      |      |     |     |     |
| <b>(f) Artificial sounds &gt; SW</b> |      |      |     |     |     |
| L planum temporale                   | 1315 | Inf  | -52 | -20 | 4   |
| L superior temporal gyrus            |      | 7.77 | -56 | -32 | 8   |
| L superior temporal sulcus           |      | 5.51 | -50 | -2  | -10 |
| R planum temporale                   | 1648 | Inf  | 54  | -16 | 2   |
| R superior temporal gyrus            |      | Inf  | 66  | -22 | 6   |
| R superior temporal sulcus           |      | 6.60 | 52  | 0   | -10 |

**Table S13 | Functional brain clusters resulting from connectivity analyses. (a)** Significant functional connectivity with right fronto-parietal seeds, **(b)** left auditory cortex seeds, **(c)** right auditory cortex seeds. Voxel-level threshold of  $p=0.005$  combined with an FWE-corrected cluster-level threshold of  $p=0.05$ .

| Cluster                                            | Cluster size | MNI coordinates |     |     |
|----------------------------------------------------|--------------|-----------------|-----|-----|
|                                                    |              | x               | y   | z   |
| <b>(a) Right fronto-parietal seeds</b>             |              |                 |     |     |
| L inferior frontal gyrus, insula                   | 883          | -34             | 24  | -6  |
| R medial frontal cortex, anterior cingulate cortex | 617          | 6               | 22  | 50  |
| R inferior frontal cortex, insula                  | 328          | 44              | 18  | 0   |
| <b>(b) Left auditory cortex seeds</b>              |              |                 |     |     |
| L medial frontal cortex                            | 1171         | -6              | 42  | 46  |
| L motor cortex                                     | 497          | -26             | -20 | 68  |
| L angular gyrus, superior temporal sulcus          | 461          | -24             | -84 | -38 |
| L superior temporal gyrus                          | 437          | -58             | -62 | 22  |
| R angular gyrus, superior temporal sulcus          | 1598         | 36              | -80 | 44  |
| R inferior frontal gyrus, insula                   | 383          | 46              | 12  | 4   |
| <b>(c) Right auditory cortex seeds</b>             |              |                 |     |     |
| L cuneus                                           | 415          | -4              | -92 | 34  |

**Table S14 | Peak location of brain activity for the cross-correlation analysis. (a)** Significant brain activity for the cross-correlation approach with the acoustic patterns and **(b)** with the perceptual rating patterns. All brain activity includes a voxel threshold  $p < 0.05$  (FWE corrected), cluster threshold  $k=10$ .

| Region                                          | Cluster size | Z value | MNI coordinates |     |    |
|-------------------------------------------------|--------------|---------|-----------------|-----|----|
|                                                 |              |         | x               | y   | z  |
| <b>(a) Acoustic: cross-correlation</b>          |              |         |                 |     |    |
| L superior temporal gyrus                       | 9548         | Inf     | -56             | -10 | -2 |
|                                                 |              | Inf     | -60             | -30 | 2  |
| L motor cortex                                  |              | 6.57    | -58             | 6   | 16 |
| L middle frontal gyrus                          | 152          | 5.46    | -48             | -4  | 50 |
|                                                 |              | 5.06    | -50             | -16 | 44 |
| L motor cortex                                  |              | 4.84    | -40             | -12 | 52 |
| R superior temporal gyrus                       | 8005         | Inf     | 54              | -8  | -6 |
|                                                 |              | Inf     | 60              | -18 | -4 |
| R inferior frontal gyrus                        |              | 5.48    | 52              | 28  | 6  |
| R motor cortex                                  | 357          | 5.77    | 50              | 4   | 40 |
| R inferior frontal sulcus                       |              | 4.93    | 44              | 14  | 40 |
| R medial frontal cortex                         | 105          | 5.37    | 2               | 10  | 52 |
| R medial frontal cortex                         | 44           | 5.33    | 8               | 58  | 32 |
| R angular gyrus                                 | 48           | 5.22    | 38              | -68 | 42 |
| R precuneus                                     | 24           | 5.16    | 2               | -54 | 44 |
| R motor cortex                                  | 21           | 5.08    | 44              | -14 | 52 |
| R middle frontal gyrus                          |              | 4.67    | 44              | -4  | 54 |
| R inferior frontal gyrus                        | 42           | 4.94    | 46              | 24  | 28 |
|                                                 |              |         |                 |     |    |
| <b>(b) Perceptual rating: cross-correlation</b> |              |         |                 |     |    |
| L Heschl's gyrus                                | 641          | 5.90    | -42             | -30 | 6  |
| R planum temporale                              | 1046         | 6.63    | 46              | -22 | 2  |
| R superior temporal gyrus                       |              | 6.59    | 58              | -26 | 10 |
