# Supplementary material for: Psychoacoustic and Archeoacoustic nature of ancient Aztec skull whistles
Source: PubMed Central journal article supplement — Commun Psychol. 2024 Nov 11;2:108. doi: 10.1038/s44271-024-00157-7 (PMC11555264; doi:10.1038/s44271-024-00157-7), 2024-11-11
Supplement: 44271_2024_157_MOESM3_ESM.pdf [file 44271_2024_157_MOESM3_ESM.pdf]

## Reporting Summary

Nature Portfolio wishes to improve the reproducibility of the work that we publish. This form provides structure for consistency and transparency in reporting. For further information on Nature Portfolio policies, see our [Editorial Policies](#) and the [Editorial Policy Checklist](#).

### Statistics

For all statistical analyses, confirm that the following items are present in the figure legend, table legend, main text, or Methods section.

n/a | Confirmed

- |                                     |                                     |                                                                                                                                                                                                                                                            |
|-------------------------------------|-------------------------------------|------------------------------------------------------------------------------------------------------------------------------------------------------------------------------------------------------------------------------------------------------------|
| <input type="checkbox"/>            | <input checked="" type="checkbox"/> | The exact sample size ( $n$ ) for each experimental group/condition, given as a discrete number and unit of measurement                                                                                                                                    |
| <input type="checkbox"/>            | <input checked="" type="checkbox"/> | A statement on whether measurements were taken from distinct samples or whether the same sample was measured repeatedly                                                                                                                                    |
| <input type="checkbox"/>            | <input checked="" type="checkbox"/> | The statistical test(s) used AND whether they are one- or two-sided<br><i>Only common tests should be described solely by name; describe more complex techniques in the Methods section.</i>                                                               |
| <input type="checkbox"/>            | <input checked="" type="checkbox"/> | A description of all covariates tested                                                                                                                                                                                                                     |
| <input type="checkbox"/>            | <input checked="" type="checkbox"/> | A description of any assumptions or corrections, such as tests of normality and adjustment for multiple comparisons                                                                                                                                        |
| <input type="checkbox"/>            | <input checked="" type="checkbox"/> | A full description of the statistical parameters including central tendency (e.g. means) or other basic estimates (e.g. regression coefficient) AND variation (e.g. standard deviation) or associated estimates of uncertainty (e.g. confidence intervals) |
| <input type="checkbox"/>            | <input checked="" type="checkbox"/> | For null hypothesis testing, the test statistic (e.g. $F$ , $t$ , $r$ ) with confidence intervals, effect sizes, degrees of freedom and $P$ value noted<br><i>Give <math>P</math> values as exact values whenever suitable.</i>                            |
| <input checked="" type="checkbox"/> | <input type="checkbox"/>            | For Bayesian analysis, information on the choice of priors and Markov chain Monte Carlo settings                                                                                                                                                           |
| <input checked="" type="checkbox"/> | <input type="checkbox"/>            | For hierarchical and complex designs, identification of the appropriate level for tests and full reporting of outcomes                                                                                                                                     |
| <input checked="" type="checkbox"/> | <input type="checkbox"/>            | Estimates of effect sizes (e.g. Cohen's $d$ , Pearson's $r$ ), indicating how they were calculated                                                                                                                                                         |

*Our web collection on [statistics for biologists](#) contains articles on many of the points above.*

### Software and code

Policy information about [availability of computer code](#)

Data collection

Data analysis

For manuscripts utilizing custom algorithms or software that are central to the research but not yet described in published literature, software must be made available to editors and reviewers. We strongly encourage code deposition in a community repository (e.g. GitHub). See the Nature Portfolio [guidelines for submitting code & software](#) for further information.

### Data

Policy information about [availability of data](#)

All manuscripts must include a [data availability statement](#). This statement should provide the following information, where applicable:

- Accession codes, unique identifiers, or web links for publicly available datasets
- A description of any restrictions on data availability
- For clinical datasets or third party data, please ensure that the statement adheres to our [policy](#)

The conditions of ethics approval and consent procedures do not permit the public archiving of the participants' anonymized study data. These data are available upon request to the corresponding author in consultation with the cantonal ethics committee of the Swiss canton Zurich. Preprocessed numerical data are available at <https://github.com/caneuro/skullwhistle>, and functional brain maps are available at <https://identifiers.org/neurovault.collection:18295>.

## Human research participants

Policy information about [studies involving human research participants and Sex and Gender in Research](#).

|                             |                                                                                                                                                                                                                                                                                                                                                                                                                                                                                                                                                                                                                                                                                                                              |
|-----------------------------|------------------------------------------------------------------------------------------------------------------------------------------------------------------------------------------------------------------------------------------------------------------------------------------------------------------------------------------------------------------------------------------------------------------------------------------------------------------------------------------------------------------------------------------------------------------------------------------------------------------------------------------------------------------------------------------------------------------------------|
| Reporting on sex and gender | The sex of the participants is reported for each sample for each experiment. Sex and gender were not included as a factor in any of the analyses, because none of our hypothesis was related to participants' sex and gender.                                                                                                                                                                                                                                                                                                                                                                                                                                                                                                |
| Population characteristics  | The study included 8 different laboratory experiments with human participants.<br>Experiment 1: n=70 human participants, 43 female, mean age 25.01y, SD 4.55<br>Experiment 2: n=40 human participants, 25 female, mean age 24.60y, SD 3.43<br>Experiment 3: n=7 human participants, 4 female, mean age 33.57y, SD 7.25<br>Experiment 4: n=76 human participants, 52 female, mean age 24.17y, SD 4.46<br>Experiment 5: n=58 human participants, 41 female, mean age 25.60y, SD 6.29<br>Experiment 6: n=47 human participants, 34 female, mean age 23.91y, SD 4.21<br>Experiment 7: n=47 human participants, 33 female, mean age 25.02y, SD 3.91<br>Experiment 8: n=33 human participants, 18 female, mean age 26.00y, SD 5.47 |
| Recruitment                 | All participants in the studies were recruited by public announcements and volunteered to participate.                                                                                                                                                                                                                                                                                                                                                                                                                                                                                                                                                                                                                       |
| Ethics oversight            | All experiments were approved by the cantonal ethics committee of the Swiss canton of Zürich.                                                                                                                                                                                                                                                                                                                                                                                                                                                                                                                                                                                                                                |

Note that full information on the approval of the study protocol must also be provided in the manuscript.

## Field-specific reporting

Please select the one below that is the best fit for your research. If you are not sure, read the appropriate sections before making your selection.

Life sciences  Behavioural & social sciences  Ecological, evolutionary & environmental sciences

For a reference copy of the document with all sections, see [nature.com/documents/nr-reporting-summary-flat.pdf](https://www.nature.com/documents/nr-reporting-summary-flat.pdf)

## Behavioural & social sciences study design

All studies must disclose on these points even when the disclosure is negative.

|                   |                                                                                                                                                                                                                                                                                 |
|-------------------|---------------------------------------------------------------------------------------------------------------------------------------------------------------------------------------------------------------------------------------------------------------------------------|
| Study description | Quantitative acoustic, behavioral, and brain data                                                                                                                                                                                                                               |
| Research sample   | Human participants sampled from the general population by public announcements                                                                                                                                                                                                  |
| Sampling strategy | See above; exclusion criteria were having hearing and visual impairments as well as psychiatric or neurological disorders in life history                                                                                                                                       |
| Data collection   | Laboratory experiments, PC controlled experiments, sounds delivered by high-quality headphones                                                                                                                                                                                  |
| Timing            | 01/2021 - 11/2022                                                                                                                                                                                                                                                               |
| Data exclusions   | No data were excluded from the data analysis. Seven participants took part in the different laboratory experiments, but because of hardware failures of the response devices, their behavioral responses were not recorded, and no data could be included in the data analysis. |
| Non-participation | n/a                                                                                                                                                                                                                                                                             |
| Randomization     | No group allocation of participants                                                                                                                                                                                                                                             |

## Reporting for specific materials, systems and methods

We request information from authors about some types of materials, experimental systems and methods used in many studies. Here, indicate whether each material, system or method listed is relevant to your study. If you are not sure if a list item applies to your research, read the appropriate section before selecting a response.

## Materials &amp; experimental systems

- n/a  Involved in the study
- Antibodies
- Eukaryotic cell lines
- Palaeontology and archaeology
- Animals and other organisms
- Clinical data
- Dual use research of concern

## Methods

- n/a  Involved in the study
- ChIP-seq
- Flow cytometry
- MRI-based neuroimaging

## Magnetic resonance imaging

## Experimental design

- Design type
- Design specifications
- Behavioral performance measures

## Acquisition

- Imaging type(s)
- Field strength
- Sequence & imaging parameters
- Area of acquisition
- Diffusion MRI  Used  Not used

## Preprocessing

- Preprocessing software
- Normalization
- Normalization template
- Noise and artifact removal
- Volume censoring

## Statistical modeling &amp; inference

- Model type and settings
- Effect(s) tested
- Specify type of analysis:  Whole brain  ROI-based  Both
- Statistic type for inference (See [Eklund et al. 2016](#))
- Correction

## Models & analysis

- n/a | Involved in the study
- Functional and/or effective connectivity
  - Graph analysis
  - Multivariate modeling or predictive analysis

Functional and/or effective connectivity

Multivariate modeling and predictive analysis
